# Supplementary material
Source: ML conference proceedings conference paper supplement (https://proceedings.mlr.press/v108/su20a.html)
Supplement: Supplementary file 1 [file su20a-supp.pdf]

## 8 Supplementary Material

### 8.1 Proof of Theorem 1

Our proof of Theorem 1 uses techniques from Gurvits and Koiran (1997).

**Theorem.** Let  $\mathcal{F}$  be a class of real-valued, continuous functions over a set  $\mathcal{X}$ , with a finite co-VC-dimension  $D$ . Let  $g(\mathbf{x})$  be a function in the convex hull of  $\mathcal{F}$ :  $g(\mathbf{x}) = \sum_{i=1}^N w_i f_i(\mathbf{x})$ , with  $\sum_{i=1}^N w_i = 1$  and  $f_i \in \mathcal{F}$ . Assume that functions  $f_i(\mathbf{x})$  are upper-bounded by  $M$  and that the quantity  $\int f_i(\mathbf{x}) d\mathbf{x}$  is lower-bounded by  $B$  for all  $f_i$ . Let  $P$  be the probability measure over functions  $\{f_1, \dots, f_N\}$  such that  $P(f_i) = w_i$ . A sampling operation is taken to draw  $K$  functions  $\{h_1, \dots, h_K\}$  independently from  $P$ . Then, for any  $\mathbf{x} \in \mathcal{X}$ ,

$$P \left\{ \frac{1}{K} \sum_{i=1}^K h_i(\mathbf{x}) \notin [(1-\zeta)g(\mathbf{x}), (1+\zeta)g(\mathbf{x})] \right\} < 8(2K)^D \exp \left( -\frac{\zeta^2}{4} \frac{B}{M} K \right) \quad (8)$$

*Proof.* Given a function  $f \in \mathcal{F}$ , denote the expected value of  $f$  over  $\mathcal{X}$  as  $P(f) = \int f(\mathbf{x}) d\mathbf{x}$ . As the distribution of  $\mathbf{x}$  is usually unknown, in practice, an i.i.d. sample of  $K$  inputs,  $\mathbf{x}_i \in \mathcal{X}$ ,  $1 \leq i \leq K$ , is usually used to approximate  $P(f)$ . Denote the approximation as  $v(f) = \frac{1}{K} \sum_{i=1}^K f(\mathbf{x}_i)$ . In Section 8.4, we provide an inequality that bounds the relative difference between the two quantities  $P(f)$  and  $v(f)$ , using the pseudo-dimension of the function class  $\mathcal{F}$ :

$$\begin{aligned} & P \{ v(f) \notin [(1-\zeta)P(f), (1+\zeta)P(f)] \} \\ &= P \left\{ \frac{1}{K} \sum_{i=1}^K f(\mathbf{x}_i) \notin [(1-\zeta)P(f), (1+\zeta)P(f)] \right\} \\ &< 8\Pi(2K) \exp \left( -\frac{\zeta^2}{4} \frac{B}{M} K \right) \end{aligned} \quad (9)$$

where  $B$  is a lower bound of  $P(f)$  and  $M$  is an upper bound of  $f(\mathbf{x})$ ;  $\Pi(2K)$  is a quantity called the ‘‘growth function’’ that satisfies  $\Pi(2K) \leq (2K)^H$  where  $H$  is the pseudo-dimension of  $\mathcal{F}$ .

As we aim to bound  $\sum_{i=1}^K h_i(\mathbf{x})$  instead of  $\sum_{i=1}^K h(\mathbf{x}_i)$ , we make use of co-VC-dimension in the dual, instead of pseudo-dimension. By the sampling operation in our assumption, we have that for every  $\mathbf{x} \in \mathcal{X}$  and each  $h_i$ ,  $E[h_i(\mathbf{x})] = g(\mathbf{x})$ . Following techniques in Gurvits and Koiran (1997), we make the substitutions:  $f(\mathbf{x}_i) \leftarrow h_i(\mathbf{x})$ ,  $P(f) \leftarrow g(\mathbf{x})$ , and  $\Pi(2K) \leq (2K)^D$  where  $D$  is the co-VC-dimension, into the inequality (9). Then,

for any  $\mathbf{x} \in \mathcal{X}$ , we have

$$P \left\{ \frac{1}{K} \sum_{i=1}^K h_i(\mathbf{x}) \notin [(1-\zeta)g(\mathbf{x}), (1+\zeta)g(\mathbf{x})] \right\} < 8(2K)^D \exp \left( -\frac{\zeta^2}{4} \frac{B}{M} K \right) \quad \square$$

### 8.2 Max-Norm Reweighting Scheme

While multiplying two weighted sums of Gaussians, we make use of the max-norm reweighting scheme in Wrigley et al. (2017) to make multiplications more effective. Specifically, the term  $M/B$  in the convergence rate expression (6) suggests that its minimization will lead to a faster convergence. For a weighted sum of functions  $\phi(\mathbf{x}) = \sum_{i=1}^K w_i \psi_i(\mathbf{x})$  and a reweighted representation  $\phi'(\mathbf{x}) = \sum_{i=1}^K w'_i \psi'_i(\mathbf{x})$ , the max-norm scheme to minimize the  $M/B$  ratio is to set  $w'_i \propto w_i \max_{\mathbf{x}} \psi_i(\mathbf{x})$ . For a weighted sum of Gaussians,  $\phi(\mathbf{x}) = \sum_{i=1}^K w_i \mathcal{N}(\mathbf{x}; \boldsymbol{\mu}_i, \boldsymbol{\Sigma}_i)$ , to minimize the ratio, we set

$$\begin{aligned} w'_i &= w_i \max_{\mathbf{x}} \mathcal{N}(\mathbf{x}; \boldsymbol{\mu}, \boldsymbol{\Sigma}) = \frac{w_i}{(2\pi)^{d/2} \sqrt{\det \boldsymbol{\Sigma}}} \\ \psi'_i(\mathbf{x}) &= \frac{w_i}{w'_i} \psi_i(\mathbf{x}) = \exp(\mathbf{x}; \boldsymbol{\mu}, \boldsymbol{\Sigma}) \end{aligned} \quad (10)$$

where we note that the maximum of a Gaussian is achieved at  $\mathbf{x} = \boldsymbol{\mu}$  and equal to  $\left( (2\pi)^{d/2} \sqrt{\det \boldsymbol{\Sigma}} \right)^{-1}$ . The resulting sum of functions is in effect a weighted sum of Gaussian exponential components. Multiplying two Gaussian exponentials yields another exponential, with a constant factor  $s$  different from  $c$  in (7).

$$s = \exp \left( -\frac{1}{2} (\boldsymbol{\mu}_1 - \boldsymbol{\mu}_2)^T (\boldsymbol{\Sigma}_1 + \boldsymbol{\Sigma}_2)^{-1} (\boldsymbol{\mu}_1 - \boldsymbol{\mu}_2) \right) \quad (11)$$

### 8.3 Closed-Form Transition Update

In this section, we derive the closed-form transition formula previously presented in Section 4.2. To facilitate integration over product of Gaussians, we re-express Gaussians in a different form. We use results stated in Koller and Friedman (2009).

**Definition 7** (Canonical Form). A canonical form  $\mathcal{C}(\mathbf{x}; \mathbf{K}, \mathbf{h}, g)$  where  $\mathbf{x} \in \mathbb{R}^d$ ,  $\mathbf{K} \in \mathbb{R}^{d \times d}$ ,  $\mathbf{h} \in \mathbb{R}^d$  and  $g$  is a scalar, is defined as

$$\mathcal{C}(\mathbf{x}; \mathbf{K}, \mathbf{h}, g) = \exp \left( -\frac{1}{2} \mathbf{x}^T \mathbf{K} \mathbf{x} + \mathbf{h}^T \mathbf{x} + g \right) \quad (12)$$

A Gaussian function,  $\mathcal{N}(\mathbf{x}; \boldsymbol{\mu}, \boldsymbol{\Sigma})$  over  $\mathbf{x} \in \mathbb{R}^d$ , can be equivalently expressed in canonical form  $\mathcal{C}(\mathbf{x}; \mathbf{K}, \mathbf{h}, g)$  with  $\mathbf{K} = \boldsymbol{\Sigma}^{-1}$ ,  $\mathbf{h} = \boldsymbol{\Sigma}^{-1}\boldsymbol{\mu}$ , and

$$g = -\frac{1}{2}\boldsymbol{\mu}^T \boldsymbol{\Sigma}^{-1} \boldsymbol{\mu} - \frac{d}{2} \log 2\pi - \frac{1}{2} \log \det \boldsymbol{\Sigma}$$

The product of two canonical forms over the same  $\mathbf{x}$ :

$$\begin{aligned} & \mathcal{C}(\mathbf{x}; \mathbf{K}_1, \mathbf{h}_1, g_1) \cdot \mathcal{C}(\mathbf{x}; \mathbf{K}_2, \mathbf{h}_2, g_2) \\ &= \mathcal{C}(\mathbf{x}; \mathbf{K}_1 + \mathbf{K}_2, \mathbf{h}_1 + \mathbf{h}_2, g_1 + g_2) \end{aligned}$$

When we have two canonical forms over different scopes  $\mathbf{x}$  and  $\mathbf{y}$ , we extend the scopes of both to make them match and then perform the above multiplication. The extension of scope is by adding zero entries to both the  $\mathbf{K}$  matrices and the  $\mathbf{h}$  vectors.

Next, consider the marginalization operation. Let  $\mathcal{C}(\mathbf{x}, \mathbf{y}; \mathbf{K}, \mathbf{h}, g)$  be a canonical form over  $\{\mathbf{x}, \mathbf{y}\}$  where

$$\mathbf{K} = \begin{pmatrix} \mathbf{K}^{xx} & \mathbf{K}^{xy} \\ \mathbf{K}^{yx} & \mathbf{K}^{yy} \end{pmatrix}, \quad \mathbf{h} = \begin{pmatrix} \mathbf{h}^x \\ \mathbf{h}^y \end{pmatrix}$$

The marginalization of this canonical form onto the variables  $\mathbf{x}$  is the integral over the variables  $\mathbf{y} \in \mathbb{R}^d$ ,  $\int \mathcal{C}(\mathbf{x}, \mathbf{y}; \mathbf{K}, \mathbf{h}, g) d\mathbf{y}$ . The result of the integration is a canonical form  $\mathcal{C}(\mathbf{x}; \mathbf{K}', \mathbf{h}', g')$  given by:

$$\begin{aligned} \mathbf{K}' &= \mathbf{K}^{xx} - \mathbf{K}^{xy}(\mathbf{K}^{yy})^{-1}\mathbf{K}^{yx} \\ \mathbf{h}' &= \mathbf{h}^x - \mathbf{K}^{xy}(\mathbf{K}^{yy})^{-1}\mathbf{h}^y \\ g' &= g + \frac{1}{2} \left( d \log 2\pi - \log \det \mathbf{K}^{yy} + (\mathbf{h}^y)^T \mathbf{K}^{yy} \mathbf{h}^y \right) \end{aligned}$$

Moreover, according to [Petersen et al.](#), the inverse of a matrix in block representation can be expressed as,

$$\begin{aligned} & \begin{pmatrix} \mathbf{K}^{xx} & \mathbf{K}^{xx'} \\ \mathbf{K}^{x'x} & \mathbf{K}^{x'x'} \end{pmatrix}^{-1} \\ &= \begin{pmatrix} \mathbf{M}_1^{-1} & -(\mathbf{K}^{xx})^{-1}\mathbf{K}^{xx'}\mathbf{M}_2^{-1} \\ -\mathbf{M}_2^{-1}\mathbf{K}^{x'x}(\mathbf{K}^{xx})^{-1} & \mathbf{M}_2^{-1} \end{pmatrix} \end{aligned}$$

where

$$\begin{aligned} \mathbf{M}_1 &= \mathbf{K}^{xx} - \mathbf{K}^{xx'}(\mathbf{K}^{x'x'})^{-1}\mathbf{K}^{x'x} \\ \mathbf{M}_2 &= \mathbf{K}^{x'x'} - \mathbf{K}^{x'x}(\mathbf{K}^{xx})^{-1}\mathbf{K}^{xx'} \end{aligned}$$

We are now ready to derive the closed-form transition formula. Consider a Gaussian function over  $\mathbf{x}$  and  $\mathbf{x}'$ :  $\mathcal{N}(\mathbf{x}, \mathbf{x}'; \boldsymbol{\mu}, \boldsymbol{\Sigma})$ , expressed in its corresponding canonical form  $\mathcal{C}(\mathbf{x}, \mathbf{x}'; \mathbf{K}, \mathbf{h}, g)$ . Assume that parameters  $\mathbf{K} \in \mathbb{R}^{(2d)^2}$  and  $\mathbf{h} \in \mathbb{R}^{2d}$  are given by:

$$\mathbf{K} = \begin{pmatrix} \mathbf{K}^{xx} & \mathbf{K}^{xx'} \\ \mathbf{K}^{x'x} & \mathbf{K}^{x'x'} \end{pmatrix}, \quad \mathbf{h} = \begin{pmatrix} \mathbf{h}^x \\ \mathbf{h}^{x'} \end{pmatrix}$$

Denote belief and transition as weighted sums of Gaussians.

$$\begin{aligned} \text{bel}_{t-1}(\mathbf{x}) &= \sum_{i=1}^{K_1} w_i \mathcal{N}(\mathbf{x}; \mathbf{a}_i, \mathbf{A}_i) \\ &= \sum_{i=1}^{K_1} w_i \mathcal{C}(\mathbf{x}; \mathbf{J}_i, \mathbf{m}_i, n_i) \\ &= \sum_{i=1}^{K_1} w_i \mathcal{C}(\mathbf{x}, \mathbf{x}'; \begin{pmatrix} \mathbf{J}_i & \mathbf{0} \\ \mathbf{0} & \mathbf{0} \end{pmatrix}, \begin{pmatrix} \mathbf{m}_i \\ \mathbf{0} \end{pmatrix}, n_i) \\ p(\mathbf{x} | \mathbf{u}, \mathbf{x}') &= \sum_{j=1}^{K_2} v_j \mathcal{N}(\mathbf{x}, \mathbf{x}'; \mathbf{b}_j, \mathbf{B}_j) \\ &= \sum_{j=1}^{K_2} v_j \mathcal{C}(\mathbf{x}, \mathbf{x}'; \mathbf{K}_j, \mathbf{h}_j, g_j) \\ &= \sum_{j=1}^{K_2} v_j \mathcal{C}(\mathbf{x}, \mathbf{x}'; \begin{pmatrix} \mathbf{K}_j^{xx} & \mathbf{K}_j^{xx'} \\ \mathbf{K}_j^{x'x} & \mathbf{K}_j^{x'x'} \end{pmatrix}, \begin{pmatrix} \mathbf{h}_j^x \\ \mathbf{h}_j^{x'} \end{pmatrix}, g_j) \end{aligned}$$

Following these notations, by the multiplication and marginalization formulae, the transition update

$$\begin{aligned} & \bar{\text{bel}}_t(\mathbf{x}) \\ &= \int p(\mathbf{x} | \mathbf{u}, \mathbf{x}') \text{bel}_{t-1}(\mathbf{x}') d\mathbf{x}' \\ &= \int \sum_{i=1}^{K_1} \sum_{j=1}^{K_2} w_i v_j \\ & \quad \mathcal{C}(\mathbf{x}, \mathbf{x}'; \begin{pmatrix} \mathbf{J}_i + \mathbf{K}_j^{xx} & \mathbf{K}_j^{xx'} \\ \mathbf{K}_j^{x'x} & \mathbf{K}_j^{x'x'} \end{pmatrix}, \begin{pmatrix} \mathbf{m}_i + \mathbf{h}_j^x \\ \mathbf{h}_j^{x'} \end{pmatrix}, n_i + g_j) d\mathbf{x}' \\ &= \sum_{i=1}^{K_1} \sum_{j=1}^{K_2} w_i v_j \mathcal{C}(\mathbf{x}; \mathbf{L}_{ij}, \mathbf{q}_{ij}, m_{ij}) \end{aligned}$$

with parameters

$$\begin{aligned} \mathbf{L}_{ij} &= \mathbf{J}_i + \mathbf{K}_j^{xx} - \mathbf{K}_j^{xx'}(\mathbf{K}_j^{x'x'})^{-1}\mathbf{K}_j^{x'x} \\ \mathbf{q}_{ij} &= \mathbf{m}_i + \mathbf{h}_j^x - \mathbf{K}_j^{xx'}(\mathbf{K}_j^{x'x'})^{-1}\mathbf{h}_j^{x'} \\ m_{ij} &= n_i + g_j + \\ & \quad \frac{1}{2} \left( d \log 2\pi - \log \det \mathbf{K}_j^{x'x'} + (\mathbf{h}_j^{x'})^T \mathbf{K}_j^{x'x'} \mathbf{h}_j^{x'} \right) \end{aligned}$$

Next, we seek to express above parameters back in the moments parameterization. By our representation of  $\text{bel}_{t-1}(\mathbf{x})$  and  $p(\mathbf{x} | \mathbf{u}, \mathbf{x}')$ :

$$\begin{aligned} \mathbf{J}_i &= \mathbf{A}_i^{-1}, \quad \mathbf{m}_i = \mathbf{A}_i^{-1}\mathbf{a}_i, \\ \mathbf{K}_j &= \mathbf{B}_j^{-1}, \quad \mathbf{h}_j = \mathbf{B}_j^{-1}\mathbf{b}_j \end{aligned}$$

Matching the above parameters with the block inversion formula, it is easy to see

$$\mathbf{C}_{ij} = \mathbf{L}_{ij}^{-1} = \left( \mathbf{A}_i^{-1} + (\mathbf{B}_j^{xx})^{-1} \right)^{-1}$$

$$\mathbf{c}_{ij} = \mathbf{C}_{ij} \left( \mathbf{A}_i^{-1} \mathbf{a}_i + (\mathbf{B}_j^{xx})^{-1} \mathbf{b}_j^x \right)$$

A Gaussian with mean  $\mathbf{c}_{ij}$  and covariance  $\mathbf{C}_{ij}$  is associated with scalar  $c_{ij}$  in its canonical form,

$$c_{ij} = -\frac{1}{2} \mathbf{c}_{ij}^T (\mathbf{C}_{ij})^{-1} \mathbf{c}_{ij} - \frac{d}{2} \log 2\pi - \frac{1}{2} \log \det \mathbf{C}_{ij}$$

Calculation of the leading constant  $z_{ij}$  requires matching the following condition

$$\log z_{ij} = m_{ij} - c_{ij}$$

With algebraic manipulations, it is easy to see  $z_{ij}$  is given by the following expression

$$z_{ij} = \left( \det \left( \mathbf{A}_i + \mathbf{B}_j^{xx} \right) \right)^{-1/2} \cdot \exp \left( -\frac{1}{2} \mathbf{a}_i^T \mathbf{A}_i^{-1} \mathbf{a}_i - \frac{1}{2} \mathbf{b}_j^T \mathbf{B}_j^{-1} \mathbf{b}_j + \frac{1}{2} (\mathbf{h}_j^{x'})^T \mathbf{K}_j^{x'x'} \mathbf{h}_j^{x'} + \frac{1}{2} \mathbf{c}_{ij}^T (\mathbf{C}_{ij})^{-1} \mathbf{c}_{ij} \right)$$

#### 8.4 Multiplicative Bounds for Expected and Empirical Values of Real-Valued Functions

In this section, we provide our derivation of a bound between the expected value and sampled, empirical values of real-valued functions. A one-sided multiplicative inequality is provided in [Vapnik \(1998\)](#), while we provide our derivation of the other sided inequality. We then combine these two relative bounds to produce the inequality [\(9\)](#) which we previously used. Our derivation closely follows theorems from [Vapnik \(1998\)](#), especially Theorems 4.2, 4.2\*, 5.2, 5.3 and 5.3\*.

Let  $\mathcal{F}$  denote a function class of indicator or real-valued functions. Given a set of  $l$  data points  $z_1, \dots, z_l$  from the distribution  $\mathcal{Z}$ , the averaged empirical value  $v$  over a function  $f \in \mathcal{F}$  is defined as

$$v(f) = \frac{1}{l} \sum_{i=1}^l f(z_i)$$

while the expected value  $P(f)$  is

$$P(f) = \int f(z) dz$$

In the following, for Theorem [5](#),  $\mathcal{F}$  consists of indicator functions. For Theorems [6](#) and [7](#),  $\mathcal{F}$  is a set of real-valued functions. Let  $\Pi(l)$  denote the growth function that satisfies the inequality

$$\Pi(l) \leq l^h$$

where  $h$  is the VC-dimension or pseudo-dimension of  $\mathcal{F}$ .

**Theorem 5.** (cf. Theorem 4.2 and 4.2\* in [Vapnik \(1998\)](#)) The inequality

$$P \left\{ \sup_{f \in \mathcal{F}} \frac{v(f) - P(f)}{\sqrt{P(f)}} > \epsilon \right\} < 4 \Pi(2l) \exp \left( -\frac{\epsilon^2 l}{4} \right) \quad (13)$$

holds true.

*Proof.* Consider two events constructed from a random and independent sample of size  $2l$ :

$$\mathcal{Q}_1 = \left\{ z : \sup_{f \in \mathcal{F}} \frac{v_1(A_f) - P(A_f)}{\sqrt{P(A_f)}} > \epsilon \right\},$$

$$\mathcal{Q}_2 = \left\{ z : \sup_{f \in \mathcal{F}} \frac{v_1(A_f) - v_2(A_f)}{\sqrt{v(A_f) + \frac{1}{2 \log l}}} > \epsilon \right\},$$

where  $A_f$  is the event

$$A_f = \{z : f(z) = 1\}$$

$P(A_f)$  is the probability of event  $A_f$ :

$$P(A_f) = \int f(z) dz$$

$v_1(A_f)$  is the frequency of event  $A_f$  computed from the first half-sample  $z_1, \dots, z_l$  of the sample  $z_1, \dots, z_{2l}$ :

$$v_1(A_f) = \frac{1}{l} \sum_{i=1}^l f(z_i)$$

and  $v_2(A_f)$  is the frequency of event  $A_f$  computed from the second half-sample  $z_{l+1}, \dots, z_{2l}$ :

$$v_2(A_f) = \frac{1}{l} \sum_{i=l+1}^{2l} f(z_i)$$

Denote  $v(A_f) = \frac{1}{2}(v_1(A_f) + v_2(A_f))$ . Note that in the case  $l \leq \epsilon^{-2}$ , the assertion of the theorem is trivial as the right-hand side of the inequality exceeds one. Accordingly we shall prove the theorem as follows: First we show that for  $l > \epsilon^{-2}$  the inequality  $P(\mathcal{Q}_1) < 4P(\mathcal{Q}_2)$  is valid (Lemma [5.1](#)), and then we bound  $P(\mathcal{Q}_2)$  (Lemma [5.2](#)).  $\square$

**Lemma 5.1.** (cf. Lemma 4.1 in [Vapnik \(1998\)](#)) For  $l > \max\{\exp(-\frac{\sqrt{\epsilon^2+4}+\epsilon}{2\sqrt{2}\epsilon}), [1 - \frac{1}{4}(-\epsilon + \sqrt{\epsilon^2+4})^2]^{-1}\}$ , the probability

$$P(\mathcal{Q}_1) < \frac{1}{4} P(\mathcal{Q}_2)$$

is valid.

*Proof.* Assume that  $\mathcal{Q}_1$  has occurred. This means that there exists event  $A^*$  such that for the first half-sample the equality

$$v_1(A^*) - P(A^*) > \epsilon\sqrt{P(A^*)}$$

is fulfilled. Since  $v_1(A^*) < 1$ , this implies that  $\epsilon\sqrt{P(A^*)} + P(A^*) < 1$ .

Let  $f(x) = x^2 + \epsilon x - 1$  with  $x \in [0, 1]$ . Then  $f'(x) = 2x + \epsilon > 0$  for all  $x$ . Hence  $f(x)$  is strictly increasing on  $[0, 1]$ . Notice  $f(0) = -1 < 0$ ,  $f(1) = \epsilon > 0$ . Thus there exists a root for  $f(x) = 0$  on the interval  $[0, 1]$ . There are two solutions to  $f(x) = 0$ :  $x_1 = \frac{1}{2}(-\epsilon - \sqrt{\epsilon^2 + 4}) < 0$  (rejected),  $x_2 = \frac{1}{2}(-\epsilon + \sqrt{\epsilon^2 + 4}) \in [0, 1]$ . Hence  $\epsilon\sqrt{P(A^*)} + P(A^*) < 1$  implies  $\sqrt{P(A^*)} < \frac{1}{2}(-\epsilon + \sqrt{\epsilon^2 + 4})$ .

Assume that for the second half-sample the frequency of the event  $A^*$  is less than the probability  $P(A^*)$ :

$$v_2(A^*) < P(A^*)$$

Under these conditions, we prove that event  $\mathcal{Q}_2$  will definitely occur. To do this, we bound the quantity

$$\mu = \frac{v_1(A^*) - v_2(A^*)}{\sqrt{v(A^*) + \frac{1}{2\log l}}}$$

under the conditions

$$\begin{aligned} v_1(A^*) &> P(A^*) + \epsilon\sqrt{P(A^*)} \\ v_2(A^*) &< P(A^*) \\ \sqrt{P(A^*)} &< \frac{1}{2}(-\epsilon + \sqrt{\epsilon^2 + 4}) \end{aligned}$$

For this purpose, we find the minimum of the function

$$T = \frac{x - y}{\sqrt{x + y + c}}$$

in the domain  $0 < a \leq x \leq 1$ ,  $0 < y \leq b$ ,  $c > 0$ . We have

$$\begin{aligned} \frac{\partial T}{\partial x} &= \frac{1}{2} \frac{x + 3y + 2c}{(x + y + c)^{3/2}} > 0 \\ \frac{\partial T}{\partial y} &= -\frac{1}{2} \frac{3x + y + 2c}{(x + y + c)^{3/2}} < 0 \end{aligned}$$

Consequently,  $T$  attains its minimum in the admissible domain at the boundary points  $x = a$  and  $y = b$ .

Specific to the quantity  $\mu$ , the above boundary points are equivalent to the conditions when  $x = v_1(A^*) = P(A^*) + \epsilon\sqrt{P(A^*)}$  and  $y = v_2(A^*) = P(A^*)$ . Thus, the quantity  $\mu$  is bounded from below,

$$\mu \geq \frac{\epsilon\sqrt{2P(A^*)}}{\sqrt{2P(A^*) + \epsilon\sqrt{P(A^*)} + \frac{\sqrt{2}}{2\log l}}}$$

From the given conditions, observe that

$$\begin{aligned} l &> \exp\left(-\frac{\sqrt{\epsilon^2 + 4} + \epsilon}{2\sqrt{2}\epsilon}\right) && \Leftrightarrow \\ 2\log l &> -\frac{\sqrt{\epsilon^2 + 4} + \epsilon}{\sqrt{2}\epsilon} && \Leftrightarrow \\ \frac{\sqrt{2}}{2\log l} &< -\frac{1}{2}\epsilon(\sqrt{\epsilon^2 + 4} - \epsilon) \end{aligned}$$

Since  $\sqrt{P(A^*)} < \frac{1}{2}(-\epsilon + \sqrt{\epsilon^2 + 4})$  and  $\frac{\sqrt{2}}{2\log l} < -\frac{1}{2}\epsilon(-\epsilon + \sqrt{\epsilon^2 + 4})$ , we have:

$$\mu \geq \frac{\epsilon\sqrt{2P(A^*)}}{\sqrt{2P(A^*) + \frac{1}{2}\epsilon(-\epsilon + \sqrt{\epsilon^2 + 4}) - \frac{1}{2}\epsilon(-\epsilon + \sqrt{\epsilon^2 + 4})}} = \epsilon$$

Thus, if  $\mathcal{Q}_1$  occurs and the condition  $v_2(A^*) < P(A^*)$  is satisfied, then  $\mathcal{Q}_2$  occurs as well.

The second half-sample is chosen independently of the first one. By Corollary 3 in [Greenberg and Mohri \(2014\)](#), the event

$$v_2(A^*) < P(A^*)$$

occurs with probability exceeding 1/4 if

$$\begin{aligned} P(A^*) &< \frac{1}{4}(-\epsilon + \sqrt{\epsilon^2 + 4})^2 < 1 - \frac{1}{l} \Rightarrow \\ l &> [1 - \frac{1}{4}(-\epsilon + \sqrt{\epsilon^2 + 4})^2]^{-1} \end{aligned}$$

This is fulfilled by the condition of the lemma. Thus, we have

$$P(\mathcal{Q}_2) > \frac{1}{4}P(\mathcal{Q}_1)$$

□

**Lemma 5.2.** (cf. Lemma 4.2 in [Vapnik \(1998\)](#)) For  $l > \exp\left(-\frac{\sqrt{\epsilon^2 + 4} + \epsilon}{\sqrt{2}\epsilon}\right)$ , the bound

$$P(\mathcal{Q}_2) < \Pi(2l) \exp\left(-\frac{\epsilon^2 l}{4}\right)$$

is valid.

*Proof.* Denote by  $R_A(Z^{2l})$  the quantity

$$R_A(Z^{2l}) = \frac{v_1(A) - v_2(A)}{\sqrt{v(A) + 1/(2\log l)}}$$

then the estimated probability equals

$$P(\mathcal{Q}_2) = \int_{Z^{(2l)}} \theta \left[ \sup_{A \in \mathcal{S}} R_A(Z^{2l}) - \epsilon \right] dF(Z^{2l})$$

where  $\theta$  is the sign function. Here the integration is carried out over the space of all possible samples of size  $2l$ .

Consider now all possible permutations  $T_i$ ,  $i = 1, 2, \dots, (2l)!$  of the sequence  $z_1, \dots, z_{2l}$ . For each such permutation the equality

$$\int_{Z^{(2l)}} \theta \left[ \sup_{A \in S} R_A(Z^{2l}) - \epsilon \right] dF(Z^{2l}) = \int_{Z^{(2l)}} \theta \left[ \sup_{A \in S} R_A(T_i Z^{2l}) - \epsilon \right] dF(Z^{2l})$$

is valid. Therefore the equality

$$\begin{aligned} P(\mathcal{Q}_2) &= \int_{Z^{(2l)}} \theta \left[ \sup_{A \in S} R_A(Z^{2l}) - \epsilon \right] dF(Z^{2l}) \\ &= \int_{Z^{(2l)}} \frac{1}{(2l)!} \sum_{i=1}^{(2l)!} \theta \left[ \sup_{A \in S} R_A(T_i Z^{2l}) - \epsilon \right] dF(Z^{2l}) \end{aligned} \quad (14)$$

is valid.

Now consider the integrand. Since the sample  $z_1, \dots, z_{2l}$  is fixed, instead of the system of events  $S$  one can consider a finite system of events  $S^*$  which contains one representative for each one of the equivalence classes. Thus the equality

$$\begin{aligned} \frac{1}{(2l)!} \sum_{i=1}^{(2l)!} \theta \left[ \sup_{A \in S} R_A(T_i Z^{2l}) - \epsilon \right] &= \\ \frac{1}{(2l)!} \sum_{i=1}^{(2l)!} \theta \left[ \sup_{A \in S^*} R_A(T_i Z^{2l}) - \epsilon \right] & \end{aligned}$$

is valid. Furthermore,

$$\begin{aligned} &\frac{1}{(2l)!} \sum_{i=1}^{(2l)!} \theta \left[ \sup_{A \in S} R_A(T_i Z^{2l}) - \epsilon \right] \\ &< \frac{1}{(2l)!} \sum_{i=1}^{(2l)!} \sum_{A \in S^*} \theta \left[ R_A(T_i Z^{2l}) - \epsilon \right] \\ &= \sum_{A \in S^*} \left\{ \frac{1}{(2l)!} \sum_{i=1}^{(2l)!} \theta \left[ R_A(T_i Z^{2l}) - \epsilon \right] \right\} \end{aligned}$$

The expression in braces is the probability of greater than  $\epsilon$  deviation of the frequencies in two half-samples for a fixed event  $A$  and a given composition of a complete sample. This probability equals

$$\Gamma = \sum_k \frac{C_m^k C_{2l-m}^{l-k}}{C_{2l}^l}$$

where  $m$  is the number of occurrences of event  $A$  in a complete sample;  $k$  is the number of occurrences of the event in the first half-sample and runs over these values:

$$\begin{aligned} \max(0, m-l) &\leq k \leq \min(m, l) \\ \frac{k}{l} - \frac{m-k}{l} &> \epsilon \sqrt{\frac{m}{2l} + \frac{1}{2 \log l}} \end{aligned}$$

Denote by  $\epsilon^*$  the quantity

$$\sqrt{\frac{m}{2l} + \frac{1}{2 \log l}} \epsilon = \epsilon^*$$

Using this notation the constraints become

$$\begin{aligned} \max(0, m-l) &\leq k \leq \min(m, l) \\ \frac{k}{l} - \frac{m-k}{l} &> \epsilon^* \end{aligned} \quad (15)$$

It can be shown<sup>2</sup> that the following bound on the quantity  $\Gamma$  under constraints (15) is valid:

$$\Gamma < \exp \left( -\frac{(l+1)(\epsilon^*)^2 l^2}{(m+1)(2l-m+1)} \right) \quad (16)$$

Substituting in  $\epsilon^*$ ,

$$\begin{aligned} \Gamma &< \exp \left( -\frac{(l+1)\epsilon^2 l^2}{(m+1)(2l-m+1)} \left( \frac{m}{2l} + \frac{1}{2 \log l} \right) \right) \\ &< \exp \left( -\frac{(l+1)\epsilon^2 l^2}{(m+1)(2l-m+1)} \frac{m+1}{2l} \right) \end{aligned}$$

The second inequality is derived by noting  $\frac{1}{\log l} > \frac{1}{l}$ . For the inequality,  $\Gamma < \exp \left( -\frac{(l+1)\epsilon^2 l^2}{(m+1)(2l-m+1)} \frac{m+1}{2l} \right)$ , the right-hand side reaches its maximum at  $m = 0$ . Thus,

$$\Gamma < \exp \left( -\frac{\epsilon^2 l}{4} \right) \quad (17)$$

Substituting (17) into the right-hand side of (14) and integrating, we have

$$\begin{aligned} P(\mathcal{Q}_2) &= \int_{Z^{(2l)}} N^S(Z^{2l}) \exp \left( -\frac{\epsilon^2 l}{4} dF(Z^{2l}) \right) \\ &< \Pi(2l) \exp \left( -\frac{\epsilon^2 l}{4} \right) \end{aligned}$$

□

The above theorems are for indicator functions. We next consider the case of real-valued functions, whose probability bounds are directly dependent on the above binary bounds.

<sup>2</sup>See Section 4.13 of Vapnik (1998).

**Theorem 6.** (cf. Theorem 5.2 in [Vapnik \(1998\)](#)) Let  $\mathcal{F}$  be a set of real-valued, non-negative functions. Let  $\Pi(l)$  be the growth function of indicators for this set of functions. Let auxiliary function  $D(f) = \int_0^\infty \sqrt{P\{f(z) > c\}} dc$ . Then, the inequality

$$P \left\{ \sup_{f \in \mathcal{F}} \frac{v(f) - P(f)}{D(f)} > \epsilon \right\} < 4\Pi(2l) \exp \left( -\frac{\epsilon^2 l}{4} \right) \quad (18)$$

is valid.

*Proof.* Consider the expression

$$\begin{aligned} & \sup_{f \in \mathcal{F}} \frac{v(f) - P(f)}{D(f)} \\ &= \sup_{f \in \mathcal{F}} \frac{\lim_{n \rightarrow \infty} \left[ \sum_{i=1}^{\infty} \frac{1}{n} v \left\{ f(z) > \frac{i}{n} \right\} - \sum_{i=1}^{\infty} \frac{1}{n} P \left\{ f(z) > \frac{i}{n} \right\} \right]}{D(f)} \end{aligned} \quad (19)$$

We show that if inequality

$$\sup_{f \in \mathcal{F}} \frac{v \left\{ f(z) > \frac{i}{n} \right\} - P \left\{ f(z) > \frac{i}{n} \right\}}{\sqrt{P \left\{ f(z) > \frac{i}{n} \right\}}} \leq \epsilon \quad (20)$$

is fulfilled, then the inequality

$$\sup_{f \in \mathcal{F}} \frac{v(f) - P(f)}{D(f)} \leq \epsilon \quad (21)$$

is fulfilled as well.

Indeed, equation [\(19\)](#) and inequality [\(20\)](#) imply that

$$\begin{aligned} & \sup_{f \in \mathcal{F}} \frac{v(f) - P(f)}{D(f)} \\ & \leq \sup_{f \in \mathcal{F}} \frac{\epsilon \lim_{n \rightarrow \infty} \sum_{i=1}^{\infty} \frac{1}{n} \sqrt{P\{f(z) > \frac{i}{n}\}}}{D(f)} = \sup_{f \in \mathcal{F}} \frac{\epsilon D(f)}{D(f)} = \epsilon \end{aligned}$$

Therefore probability of event [\(20\)](#) does not exceed probability of event [\(21\)](#). This means that the probability of the complementary events are connected by the inequality

$$\begin{aligned} & P \left\{ \sup_{f \in \mathcal{F}} \frac{v(f) - P(f)}{D(f)} > \epsilon \right\} \\ & \leq P \left\{ \sup_{f \in \mathcal{F}} \frac{v \left\{ f(z) > \beta \right\} - P \left\{ f(z) > \beta \right\}}{\sqrt{P \left\{ f(z) > \beta \right\}}} > \epsilon \right\} \end{aligned}$$

In [Theorem 5](#) we bounded the right-hand side of this inequality. Using this bound we prove the theorem.  $\square$

**Theorem 7.** (cf. Theorem 5.3 and 5.3\* in [Vapnik \(1998\)](#)) Assume that functions  $f$  are bounded above by  $M$ :  $0 \leq f(z) \leq M, f \in \mathcal{F}$ . Then, the inequality

$$P \left\{ \sup_{f \in \mathcal{F}} \frac{v(f) - P(f)}{\sqrt{P(f)}} > \epsilon \right\} < 4\Pi(2l) \exp \left( -\frac{\epsilon^2 l}{4M} \right) \quad (22)$$

is valid.

*Proof.* The proof is based on Holder's inequality for two functions. We say that function  $f(z)$  belongs to space  $L_p(a, b)$  if  $\int_a^b |f(z)|^p dz \leq \infty$ . The values  $a, b$  are not necessarily finite. Holder's inequality states that for functions  $f(z) \in L_p(a, b)$  and  $g(z) \in L_q(a, b)$ , where

$$\frac{1}{p} + \frac{1}{q} = 1, p > 0, q > 0$$

then

$$\int_a^b |f(z)g(z)| dz \leq \left( \int_a^b |f(z)|^p dz \right)^{\frac{1}{p}} \left( \int_a^b |g(z)|^q dz \right)^{\frac{1}{q}}$$

Consider the function

$$D(f) = \int_0^\infty \sqrt{P\{f(z) > c\}} dc$$

For a bounded set of functions, we can rewrite this expression in the form

$$D(f) = \int_0^M \sqrt{P\{f(z) > c\}} dc$$

Now let us denote  $f(z) = \sqrt{P\{f(z) > c\}}$  and denote  $g(z) = 1$ . Using these notations we utilize Holder's inequality. We obtain

$$\begin{aligned} D(f) &= \int_0^M \sqrt{P\{f(z) > t\}} dt \\ &< \left( \int_0^M P\{f(z) > t\} dt \right)^{1/2} M^{1/2} \end{aligned}$$

Taking into account this inequality, we obtain

$$\begin{aligned} & P \left\{ \sup_{f \in \mathcal{F}} \frac{v(f) - P(f)}{\sqrt{P(f)}} > \epsilon M^{1/2} \right\} \\ & \leq P \left\{ \sup_{f \in \mathcal{F}} \frac{v(f) - P(f)}{\int \sqrt{P\{f(z) > t\}} dt} > \epsilon \right\} \end{aligned}$$

Using the bound on the right-hand side of this inequality given by [Theorem 6](#), we obtain the desired inequality [\(22\)](#).  $\square$

### 8.4.1 Combining Inequalities

Under similar settings as Theorem 7, the following inequality is provided in the original book by Vapnik (1998):

$$P \left\{ \sup_{f \in \mathcal{F}} \frac{P(f) - v(f)}{\sqrt{P(f)}} > \epsilon \right\} < 4\Pi(2l) \exp \left( -\frac{\epsilon^2 l}{4M} \right) \quad (23)$$

Combining the above inequality with Theorem 7, we obtain the following two inequalities for a bounded, real-valued function  $f: 0 \leq f(z) \leq M, f \in \mathcal{F}$ :

$$P \left\{ \sup_{f \in \mathcal{F}} \frac{P(f) - v(f)}{\sqrt{P(f)}} > \epsilon \right\} < 4\Pi(2l) \exp \left( -\frac{\epsilon^2 l}{4M} \right)$$

$$P \left\{ \sup_{f \in \mathcal{F}} \frac{v(f) - P(f)}{\sqrt{P(f)}} > \epsilon \right\} < 4\Pi(2l) \exp \left( -\frac{\epsilon^2 l}{4M} \right)$$

Equivalently, for all  $f \in \mathcal{F}$ ,

$$P \left\{ \frac{P(f) - v(f)}{\sqrt{P(f)}} < \epsilon \right\} > 1 - 4\Pi(2l) \exp \left( -\frac{\epsilon^2 l}{4M} \right)$$

$$P \left\{ \frac{v(f) - P(f)}{\sqrt{P(f)}} < \epsilon \right\} > 1 - 4\Pi(2l) \exp \left( -\frac{\epsilon^2 l}{4M} \right)$$

Setting  $\epsilon = \zeta \sqrt{P(f)}$  for a given  $\zeta$ , we get

$$P \{v(f) > (1 - \zeta)P(f)\} > 1 - 4\Pi(2l) \exp \left( -\frac{\zeta^2 l P(f)}{4M} \right)$$

$$P \{v(f) < (1 + \zeta)P(f)\} > 1 - 4\Pi(2l) \exp \left( -\frac{\zeta^2 l P(f)}{4M} \right)$$

Consequently

$$P \{v(f) < (1 - \zeta)P(f)\} < 4\Pi(2l) \exp \left( -\frac{\zeta^2 l P(f)}{4M} \right)$$

$$P \{v(f) > (1 + \zeta)P(f)\} < 4\Pi(2l) \exp \left( -\frac{\zeta^2 l P(f)}{4M} \right)$$

The two events  $E_1 = \{f : v(f) \leq (1 - \zeta)P(f)\}$  and  $E_2 = \{f : v(f) \geq (1 + \zeta)P(f)\}$  are mutually exclusive. Hence the probability of the union,

$$\begin{aligned} P(E_1 \cup E_2) &= P(v(f) \notin [(1 - \zeta)P(f), (1 + \zeta)P(f)]) \\ &= P(E_1) + P(E_2) \\ &= 8\Pi(2l) \exp \left( -\frac{\zeta^2 l P(f)}{4M} \right) \\ &< 8\Pi(2l) \exp \left( -\frac{\zeta^2 B l}{4M} \right) \end{aligned}$$

This gives the desired inequality we used in Section 8.1, where  $B$  is a lower bound of the value  $P(f)$ , and  $M$  is an upper bound of functions  $f \in \mathcal{F}$ .
